# Supplementary material for: Visually-updated hand state estimates modulate the proprioceptive reflex independently of motor task requirements
Source: eLife. 2020 Mar 31;9:e52380. doi: 10.7554/eLife.52380 (PMC7108863; doi:10.7554/eLife.52380)
Supplement: Figure 3—source data 1. [file elife-52380-fig3-data1.txt]

Subject	Condition	BGA	SLSR	LLSR	PeakVelo	MovDur	EPmean	EPsd	VeloOnPtb
1	R0	0.37731173464322	0.809812455335038	1.09505398804036	2.84645613670349	1024	0.540077200957707	0.0243329279253774	2.49632167319457
2	R0	0.658143673257852	0.670777424846803	1.97228982595615	3.11477617263794	697.391304347826	0.532304730104364	0.0175444256960791	2.50221182823181
3	R0	0.470667245673245	1.05628806332088	0.580921053850559	5.44630501747131	826.64	0.518874623775482	0.0241514093320849	5.52288792610168
4	R0	0.329346355240692	0.372313542462362	1.11031750045823	2.36904689311981	1071.92	0.533864657878876	0.00883683397966722	1.91678255081177
5	R0	0.46216102443922	0.761374877090818	1.21376668575325	2.47884567260742	1029	0.534863029917081	0.0125446010651313	1.65007962286472
6	R0	0.25121136475357	0.974012230448377	0.986099519060035	2.46626628398895	998.16	0.529578726291656	0.0191047607104803	2.19007526397705
7	R0	0.359644123684388	1.03378594404484	1.06089488646829	4.09719320297241	754.8	0.521822469234467	0.0250002137323166	3.73270039558411
8	R0	0.303966145117442	1.04807671055238	1.01525847150562	2.82550904273987	954.75	0.523107918600241	0.021016756948532	2.57726736366749
9	R0	0.266119866417746	0.582730688949312	0.943122143295162	3.31974714279175	847.12	0.517834014892578	0.0202768553679697	3.12872156143188
10	R0	0.160054144396872	0.565352791317905	0.709830006610406	3.76021520614624	879.391304347826	0.534197182758995	0.0277880351006856	3.45781312942505
1	R45	0.460943664874917	0.725478148096597	0.944637356637585	3.47811640739441	926.56	0.517950756549835	0.0406005093446734	2.91711181640625
2	R45	0.497724126379538	0.810883932227871	1.83117400076174	3.00603414058685	728.72	0.532401883602142	0.0215200102006665	2.16257442474365
3	R45	0.482445851754033	0.886983345180342	0.545094144522076	5.50390807151794	882	0.51059309295986	0.0194863594502747	5.36390144348145
4	R45	0.258368172178053	0.314903658610881	1.11400760999941	2.36593693256378	979.92	0.526453030109405	0.0152246936870333	2.17281833291054
5	R45	0.442412752388548	0.625761796690823	1.07271638897009	2.34850509166718	1051.75	0.530601119001706	0.0123972292509186	1.58787687301636
6	R45	0.290343172917489	1.03222853191585	0.909003331605002	2.49627443790436	1008.2	0.527610370516777	0.0201730738597682	1.8799241399765
7	R45	0.370281107497892	1.02249995054824	0.96000392571448	3.85887940406799	841.75	0.519343127806981	0.0210820304386813	3.28594591140747
8	R45	0.342046109712807	1.1523909598546	1.07644858001953	2.59189508914947	1009.08333333333	0.527168224255244	0.0234890662558691	2.38123837947845
9	R45	0.238392423165013	0.696095689553765	0.880319967057133	3.22067017555237	880.24	0.518064391613007	0.0196938403990722	2.70170048236847
10	R45	0.164431361099201	0.427844521851078	0.62115137923808	3.38673444747925	953.28	0.531041893959045	0.0339828908184417	3.41808290282885
1	R90	0.478185812354622	0.718688116284254	0.805777270890077	3.45956541061401	927.666666666667	0.515131925543149	0.041940834296651	3.06997700691223
2	R90	0.472317716750618	0.893961609836987	1.55225008951212	3.31365653991699	659.25	0.533638680974642	0.020119678273795	2.54293855190277
3	R90	0.481529877167072	0.99593199942137	0.537509163909016	5.92674600601196	896.32	0.519119164943695	0.0343779898223377	5.59934489250183
4	R90	0.334394327297316	0.403764641704038	1.04366266075297	2.42992949008942	992.695652173913	0.535821948362433	0.018501555451628	2.1631575524807
5	R90	0.511125285573152	0.570643664423487	1.26760709435824	2.30750044822693	1020.48	0.537312476634979	0.0153267710152511	1.63082657257716
6	R90	0.24775681662635	0.934644879193121	0.912730554393186	2.89729297637939	914.636363636364	0.531284955414859	0.0224647986935114	2.50894466172094
7	R90	0.369605174671336	1.01247609784569	1.00296799912316	3.93609741210937	854.095238095238	0.526093559605735	0.0226731377152927	3.84229495127996
8	R90	0.266336759356761	0.967309676729824	1.11772295168586	2.51342802047729	992.666666666667	0.536574825644493	0.0226260630584266	2.37118398624918
9	R90	0.141014261768134	0.388888994348535	0.593349361080835	2.93019378662109	857.6	0.524211835861206	0.0286021631596793	2.56839515686035
10	R90	0.171811642813702	0.385848058701834	0.438592356056704	3.26546464920044	810.583333333333	0.532893672585487	0.0298794106725177	3.23109799861908
1	R135	0.388665512600072	0.721375305287198	0.944195943786407	3.50949355125427	799.5	0.531156619389852	0.0436690320279087	3.51547414779663
2	R135	0.584647266286389	0.778447937368809	1.6160016803733	3.06697764396667	666.5	0.537953515847524	0.0249468340087856	2.16689449310303
3	R135	0.402182188315878	0.969399418274995	0.538462974734305	5.65435322761536	975.84	0.516035161018372	0.0290618757474293	6.01474493741989
4	R135	0.265263823302279	0.303744462764208	0.890154799842299	2.49645791530609	949.04347826087	0.527668001859084	0.0150733787789978	2.0789055109024
5	R135	0.466069710546488	0.657347210227307	1.12172486124488	2.29916060447693	1057.6	0.52837153673172	0.0129464587154911	1.80380687388507
6	R135	0.348436025053948	1.0022026331103	1.01087572860247	2.77898914813995	897.833333333333	0.528299448390802	0.0292093590880644	2.65922753512859
7	R135	0.408089094769175	1.22617229613316	1.14470333757125	4.03297789573669	838.4	0.527776956558228	0.0393017739517502	3.88341094198681
8	R135	0.243983056271112	0.963783359207565	0.961527413469331	2.45753234863281	1029.30434782609	0.541438196016395	0.0332174328036628	2.44183662145034
9	R135	0.163839493059286	0.443008866266104	0.6348188241399	2.99017275810242	872.32	0.52103184223175	0.0308526119936122	2.68789478302002
10	R135	0.141077185724795	0.285757561215286	0.492084631475256	3.36715358734131	923.6	0.513962287902832	0.0350254562294224	3.35821375846863
1	R180	0.306906650784315	0.670073508405891	0.880390130869244	2.96207006003708	996	0.523042891336524	0.0372047796065994	2.47093659877777
2	R180	0.444675534352649	0.60202674082105	1.48201671467879	2.96337755203247	672.4	0.545815126895905	0.022501728156217	2.33966600376627
3	R180	0.35506279372208	0.821779004621084	0.503139190174119	5.61878518104553	972.916666666666	0.507874255379041	0.031956548620593	5.86303221095692
4	R180	0.261408654769069	0.334500214502402	1.06627417747289	2.41554821968079	949.25	0.52955107887586	0.0203484807568225	1.83858203291893
5	R180	0.537614204417813	0.684502414629377	1.26643902820547	2.09221337795258	1180.24	0.533950960636139	0.0164721561703755	1.65461117267609
6	R180	0.255628855568708	0.815369713809587	0.98526194422017	2.55407622337341	1012	0.536670585473379	0.0283712290418222	2.0661826548369
7	R180	0.432228856839457	1.37575532577283	1.03895086840579	3.9304088306427	818.833333333333	0.523221425712109	0.0355929336195019	3.86578989982605
8	R180	0.320089667318825	1.00043121769866	1.03536997638733	2.59207248687744	973.166666666667	0.5279459481438	0.0385127084404194	2.45392590045929
9	R180	0.175545659104136	0.340028283131341	0.676688422735436	2.87331083297729	976.695652173913	0.532270143861356	0.0188421107011118	2.61709345817566
10	R180	0.218062570117317	0.327971002242918	0.519906555536928	3.59292877197266	937.68	0.504684116840363	0.0317151381065528	3.41880547006925
